# Supplementary material for: The Extended Postoperative Care-Score (EXPO-Score)—An Objective Tool for Early Identification of Indication for Extended Postoperative Care
Source: PubMed Central journal article supplement (PMC6832365; doi:10.3390/jcm8101666), 2019-10-12
Supplement: jcm-08-01666-s001.pdf [file jcm-08-01666-s001.pdf]

**Supplementary Materials:** The following are available online at [www.mdpi.com/xxx/s1](http://www.mdpi.com/xxx/s1)

**Supplementary Figure 1: Flow chart for study Period 1 and Period 2.**

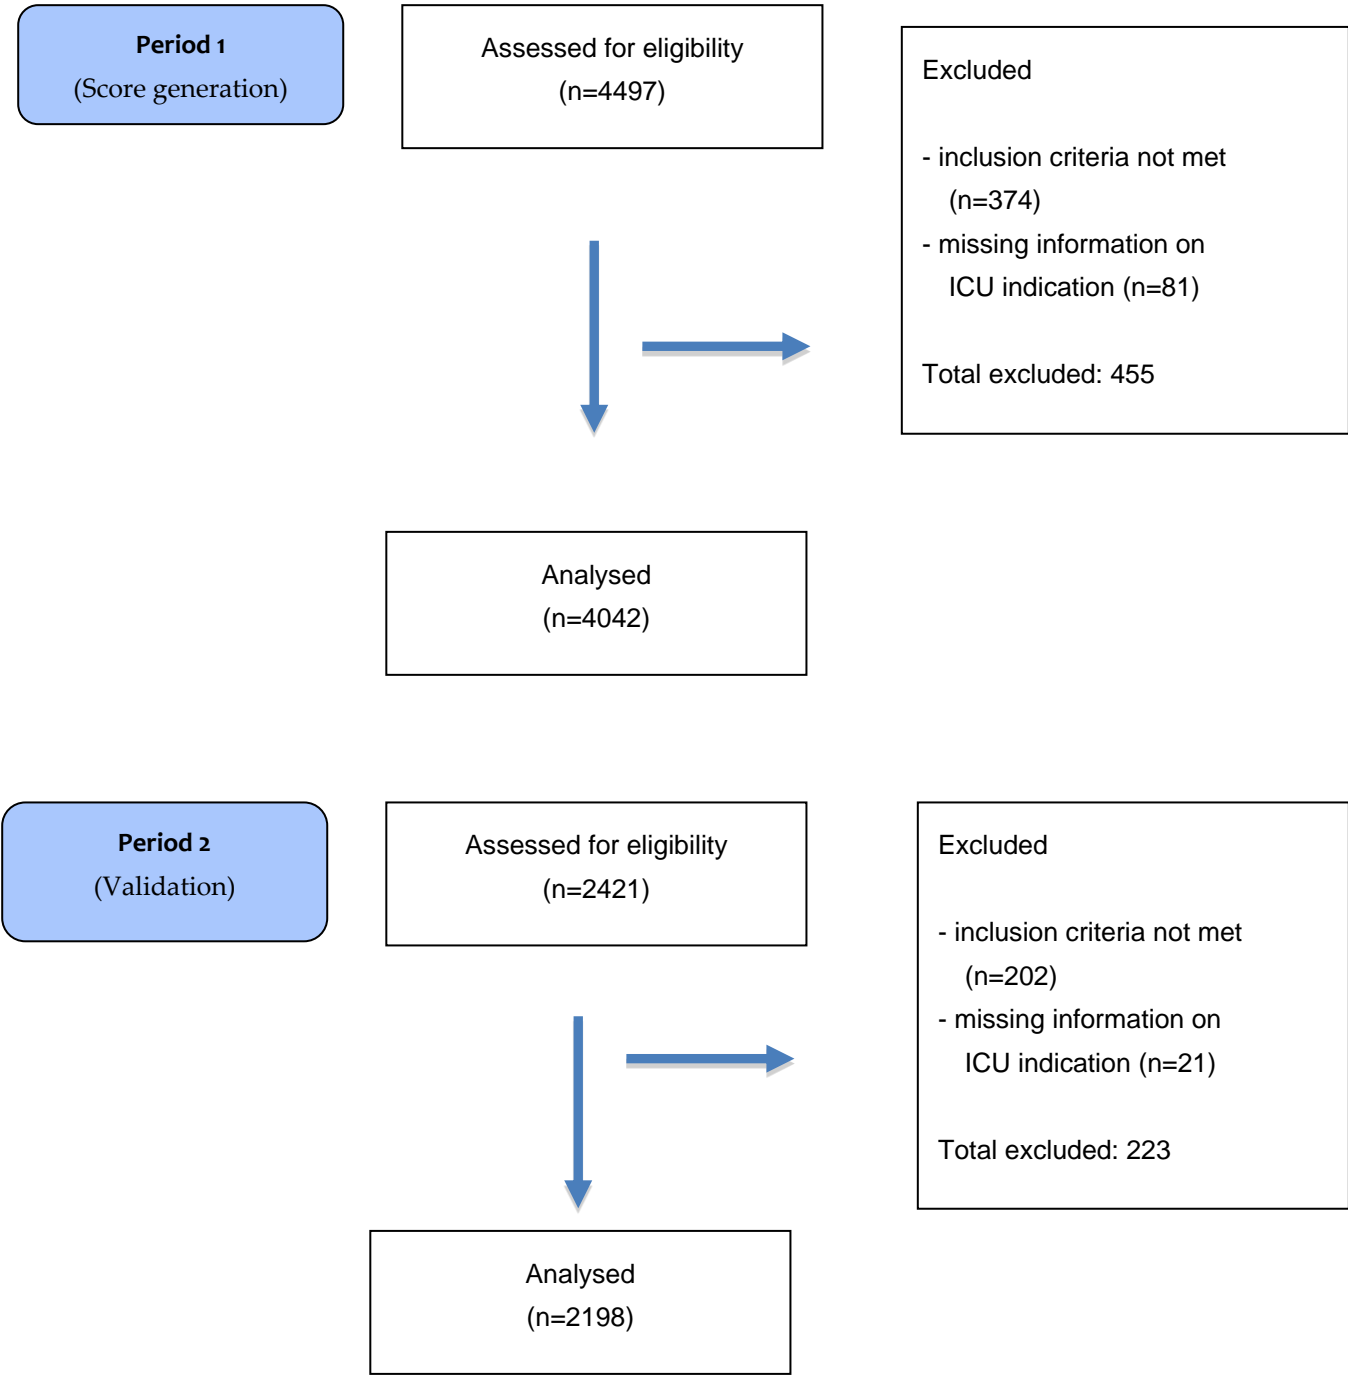

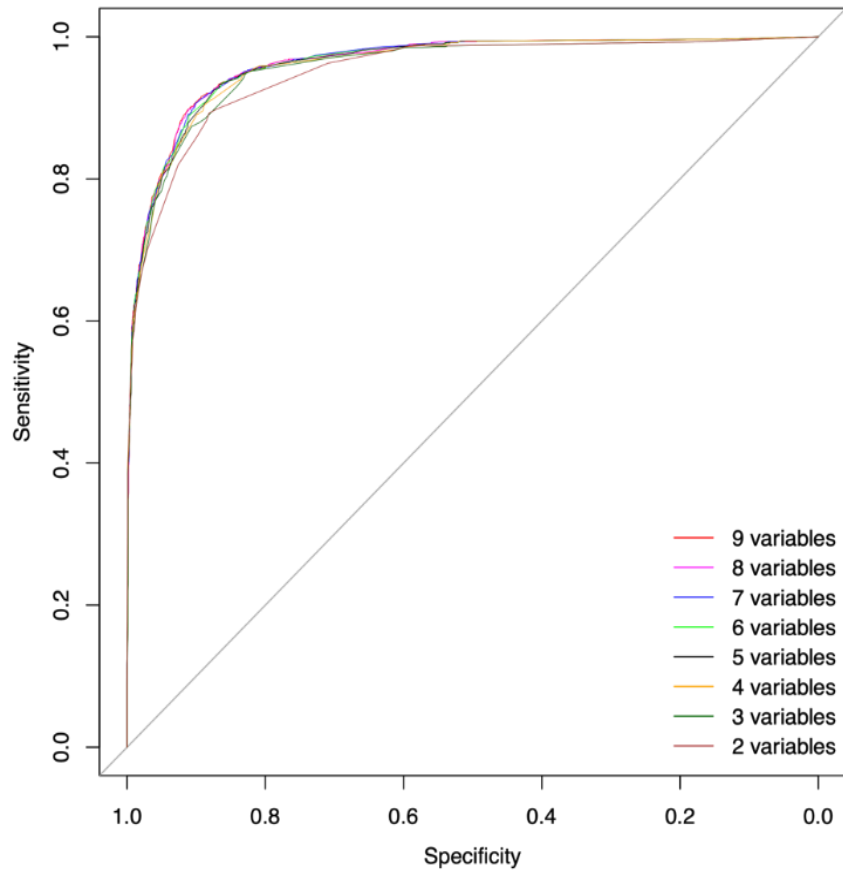

Supplementary Figure 2: Model comparison of 2-9 variables (ROC curve).

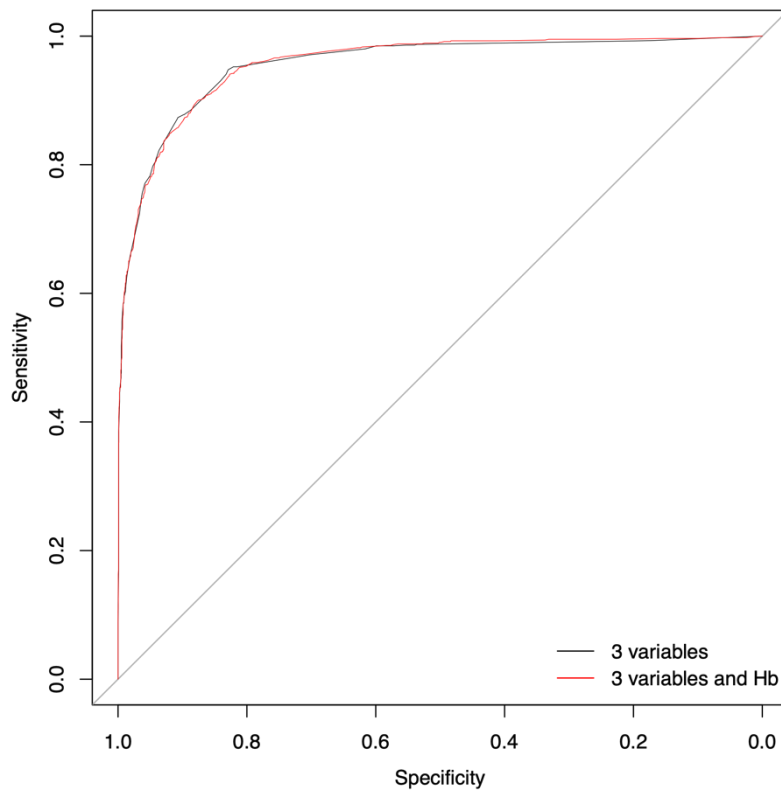

Supplementary Figure 3: Model comparison with and without Hb (ROC curve).

Supplementary Table 1: Results of the fivefold cross validation evaluation in Period 1.

| Statistical Measure | Set 1               | Set 2               | Set 3               | Set 4               | Set 5               | Ø                   | Total               |
|---------------------|---------------------|---------------------|---------------------|---------------------|---------------------|---------------------|---------------------|
| Threshold           | 0.24                | 0.10                | 0.19                | 0.18                | 0.24                | 0.19                | 0.21                |
| Specificity         | 0.92                | 0.84                | 0.90                | 0.90                | 0.89                | 0.89                | 0.91                |
| Sensitivity         | 0.89                | 0.96                | 0.90                | 0.92                | 0.91                | 0.92                | 0.90                |
| AUC                 | 0.96                | 0.96                | 0.96                | 0.96                | 0.96                | 0.96                | 0.96                |
| (95% CI)            | (0.94-0.97)         | (0.94-0.97)         | (0.94-0.97)         | (0.95-0.98)         | (0.95-0.98)         | 0.96                | (0.96-0.97)         |
| Accuracy            | 0.91                | 0.87                | 0.90                | 0.90                | 0.90                | 0.90                | 0.91                |
| Variables in model  | Urgency of surgery  | Urgency of surgery  | Urgency of surgery  | Urgency of surgery  | Urgency of surgery  | Urgency of surgery  | Urgency of surgery  |
|                     | ASA                 | ASA                 | ASA                 | ASA                 | ASA                 | ASA                 | ASA                 |
|                     | Cardiovascular PC   | Cardiovascular PC   | Cardiovascular PC   | Cardiovascular PC   | Cardiovascular PC   | Cardiovascular PC   | Cardiovascular PC   |
|                     | Neurological PC     | Neurological PC     | Neurological PC     | Neurological PC     | Neurological PC     | Neurological PC     | Neurological PC     |
|                     | Isolation           | Isolation           | Isolation           | Isolation           | Isolation           | Isolation           | Isolation           |
|                     | MET                 | MET                 | MET                 | MET                 | MET                 | MET                 | MET                 |
|                     | Kind of surgery     | Kind of surgery     | Kind of surgery     | Kind of surgery     | Kind of surgery     | Kind of surgery     | Kind of surgery     |
|                     | Infection           | Infection           | Infection           | Infection           | Infection           | Infection           | Infection           |
|                     | Sex                 | Sex                 | Sex                 | Sex                 | Sex                 | Sex                 | Sex                 |
|                     |                     | Liver insufficiency | Liver insufficiency | Liver insufficiency | Liver insufficiency | Liver insufficiency | Liver insufficiency |
|                     | Renal insufficiency | Renal insufficiency | Renal insufficiency | Renal insufficiency | Renal insufficiency | Renal insufficiency |                     |

Set i (for i between 1 and 5): predictive results for cross validation set i as test set for predictive performance; the other sets (train set) were used for model selection. Ø: average over the five sets. Total: results of model selection and predictive performance based on the complete dataset as both test and training set. The variable hemoglobin was not considered as influence variable in this analysis. PC—Precondition; AUC—Area under the curve; CI—Confidence interval; MET Metabolic equivalent

**Supplementary Table 2: Calculated EXPO-Scores for all possible combinations of ASA physical status (ASA status I-IV), MET (1:  $\geq 4$  MET / 2:  $< 4$  MET) and type of surgery (categories 1-12 as mentioned in paragraph 2.3). EXPO-Score shows values between 0 and 1; in order to receive percentages multiply score by 100.**

| ASA | MET | Surgery | EXPO-Score  |
|-----|-----|---------|-------------|
| 1   | 1   | 1       | 0,211339482 |
| 2   | 1   | 1       | 0,28613144  |
| 3   | 1   | 1       | 0,730884988 |
| 4   | 1   | 1       | 0,962503542 |
| 1   | 2   | 1       | 0,485403538 |
| 2   | 2   | 1       | 0,585215292 |
| 3   | 2   | 1       | 0,905302799 |
| 4   | 2   | 1       | 0,989053829 |
| 1   | 1   | 2       | 0,020539377 |
| 2   | 1   | 2       | 0,030411953 |
| 3   | 1   | 2       | 0,175278341 |
| 4   | 1   | 2       | 0,667633985 |
| 1   | 2   | 2       | 0,068741076 |
| 2   | 2   | 2       | 0,099430557 |
| 3   | 2   | 2       | 0,427954181 |
| 4   | 2   | 2       | 0,876096265 |
| 1   | 1   | 3       | 0,056128195 |
| 2   | 1   | 3       | 0,081680546 |
| 3   | 1   | 3       | 0,376046129 |
| 4   | 1   | 3       | 0,850662851 |
| 1   | 2   | 3       | 0,173089977 |
| 2   | 2   | 3       | 0,238438103 |
| 3   | 2   | 3       | 0,679636789 |
| 4   | 2   | 3       | 0,952496233 |
| 1   | 1   | 4       | 0,100361605 |
| 2   | 1   | 4       | 0,143000334 |
| 3   | 1   | 4       | 0,530655073 |
| 4   | 1   | 4       | 0,9144286   |
| 1   | 2   | 4       | 0,281962962 |
| 2   | 2   | 4       | 0,370021915 |
| 3   | 2   | 4       | 0,799190403 |
| 4   | 2   | 4       | 0,974103659 |
| 1   | 1   | 5       | 0,028428387 |
| 2   | 1   | 5       | 0,041930607 |
| 3   | 1   | 5       | 0,228722397 |
| 4   | 1   | 5       | 0,737038919 |

|   |   |    |             |
|---|---|----|-------------|
| 1 | 2 | 5  | 0,093378913 |
| 2 | 2 | 5  | 0,133491234 |
| 3 | 2 | 5  | 0,510730458 |
| 4 | 2 | 5  | 0,907970475 |
| 1 | 1 | 6  | 0,019029493 |
| 2 | 1 | 6  | 0,028197213 |
| 3 | 1 | 6  | 0,16430148  |
| 4 | 1 | 6  | 0,65012964  |
| 1 | 2 | 6  | 0,063919045 |
| 2 | 2 | 6  | 0,092669954 |
| 3 | 2 | 6  | 0,409000902 |
| 4 | 2 | 6  | 0,867390075 |
| 1 | 1 | 7  | 0,163054782 |
| 2 | 1 | 7  | 0,225648092 |
| 3 | 1 | 7  | 0,663809016 |
| 4 | 1 | 7  | 0,94914046  |
| 1 | 2 | 7  | 0,406801283 |
| 2 | 2 | 7  | 0,506354158 |
| 3 | 2 | 7  | 0,874218364 |
| 4 | 2 | 7  | 0,985005398 |
| 1 | 1 | 8  | 0,838964226 |
| 2 | 1 | 8  | 0,886266949 |
| 3 | 1 | 8  | 0,981412964 |
| 4 | 1 | 8  | 0,998000193 |
| 1 | 2 | 8  | 0,948290006 |
| 2 | 2 | 8  | 0,964825705 |
| 3 | 2 | 8  | 0,994648416 |
| 4 | 2 | 8  | 0,999431062 |
| 1 | 1 | 9  | 0,87744385  |
| 2 | 1 | 9  | 0,914594188 |
| 3 | 1 | 9  | 0,986405888 |
| 4 | 1 | 9  | 0,998544    |
| 1 | 2 | 9  | 0,961834537 |
| 2 | 2 | 9  | 0,974157034 |
| 3 | 2 | 9  | 0,996100108 |
| 4 | 2 | 9  | 0,999585935 |
| 1 | 1 | 10 | 0,005805453 |
| 2 | 1 | 10 | 0,008658542 |
| 3 | 1 | 10 | 0,055874668 |
| 4 | 1 | 10 | 0,358708548 |
| 1 | 2 | 10 | 0,020140677 |

|   |   |    |             |
|---|---|----|-------------|
| 2 | 2 | 10 | 0,029827448 |
| 3 | 2 | 10 | 0,172404642 |
| 4 | 2 | 10 | 0,663179141 |
| 1 | 1 | 11 | 0,033593073 |
| 2 | 1 | 11 | 0,049423507 |
| 3 | 1 | 11 | 0,260518066 |
| 4 | 1 | 11 | 0,769039628 |
| 1 | 2 | 11 | 0,109019347 |
| 2 | 2 | 11 | 0,154703807 |
| 3 | 2 | 11 | 0,553590887 |
| 4 | 2 | 11 | 0,921388525 |
| 1 | 1 | 12 | 0,315395388 |
| 2 | 1 | 12 | 0,407963209 |
| 3 | 1 | 12 | 0,823606134 |
| 4 | 1 | 12 | 0,977841947 |
| 1 | 2 | 12 | 0,618563    |
| 2 | 2 | 12 | 0,708079729 |
| 3 | 2 | 12 | 0,942645599 |
| 4 | 2 | 12 | 0,993603675 |

Categories:

- 1) large ear-nose-throat/maxillofacial tumor surgery
- 2) hip/knee arthroplasty
- 3) thoracic surgery with one-lung ventilation
- 4) upper abdominal surgery
- 5) urogenital surgery
- 6) vascular surgery
- 7) endovascular aortic repair
- 8) non-cardiac surgery with planned ICU admission
- 9) cardiac surgery
- 10) miscellaneous minor
- 11) miscellaneous intermediate
- 12) miscellaneous major
